# Supplementary material for: On Sustainable Consumption: The Implications of Trade in Virtual Water for the EU’s Food Security
Source: MDPI journal article supplement (doi:10.3390/su132111952), 2021-10-28
Supplement: s1 [file s1]

Archive with 1 entries (1 files):
- sustainability-1425381-supplementary.pdf
